# Supplementary material for: Genome-Wide Identification and Analysis of the Heat-Shock Protein Gene in L. edodes and Expression Pattern Analysis under Heat Shock
Source: MDPI journal article supplement (doi:10.3390/cimb45010041), 2023-01-09
Supplement: s1 [file s1]

**Table S1.** Primer pairs used for gene expression

| Target gene          | Description    | Forward               | Reverse                   | Length (bp) | T <sub>m</sub> (°C) |
|----------------------|----------------|-----------------------|---------------------------|-------------|---------------------|
| <i>LeHSP100. 1</i>   | Target gene    | CATCGTCAAGCGGGCACT    | TGGGCAATGTAAGAATCGTG      | 150         | 84                  |
| <i>LeHSP100. 2/3</i> | Target gene    | GTCTGCTATAATGGCTGGTT  | CTTCGTCTTCGATGTCCC        | 83          | 81                  |
| <i>LeHSP40. 1</i>    | Target gene    | GTGAAGTTGAACGTCGTGTTT | TTGCATCGTCCTGATATTCC      | 178         | 86. 1               |
| <i>LeHSP40. 2</i>    | Target gene    | CCAATAACTGGCACAGGGAC  | GGAACACGCACATCAACATC      | 182         | 85. 6               |
| <i>LeHSP40. 4</i>    | Target gene    | TCGCTGCTAAGGACCTGTAC  | GTCGGGATGATATTTCCGGCTCAGT | 104         | 85. 6               |
| <i>LeHSP60. 3</i>    | Target gene    | ATGCTCCGACATTACCAG    | AGACTTCGCTCTACTTCCTC      | 168         | 84. 3               |
| <i>LeHSP60. 4</i>    | Target gene    | GCCATGATCGCTCGTACTGCT | TTGCCAAGTCAAATCCTTCAGC    | 157         | 84. 9               |
| <i>LeHSP60. 6</i>    | Target gene    | AGGGCGAATCCCAAACAA    | AAGCACCAGATCACATCCAACT    | 128         | 83. 3               |
| <i>LeHSP70. 2</i>    | Target gene    | AGTCACTTTCCTGTCTACGA  | GACCTTCAGCAGACCGTTAG      | 154         | 84. 3               |
| <i>LeHSP70. 3</i>    | Target gene    | GCGTACCACTGACCCAT     | CCCTGAATAGCAGCACC         | 195         | 86. 4               |
| <i>LeHSP70. 4</i>    | Target gene    | TCCTCGCTCGGAACCTA     | GCACCCTGAACCCTTTT         | 120         | 82. 8               |
| <i>LeHSP90. 1</i>    | Target gene    | TACTCCGCATACTTGTTG    | GAGGGTTGACAGTGTCTTG       | 124         | 82. 6               |
| <i>LeHSP90. 2</i>    | Target gene    | CGGTGTATCGTTCAAAGC    | CCTCCGCATCTACCACTA        | 188         | 83. 9               |
| <i>LeSHSP. 1</i>     | Target gene    | ACACTAACCAACCGTCCTATT | GGCCAAGTCACTATCAATATGCCCT | 205         | 85                  |
| <i>LeSHSP. 4</i>     | Target gene    | GCGGTGAAAGTCAAGGTC    | TGCGGCAACAGTCAAACG        | 191         | 84                  |
| <i>LeSHSP. 5</i>     | Target gene    | GCCTTCTTACCACTTTGACC  | CACTGTACTAGCAGCGTCTCC     | 109         | 83. 5               |
| <i>LeTUB</i>         | Reference gene | GACATTTGCTTCCGAACCCT  | CGGACATAACAAGGGACACA      | 79          | 80. 7               |
| <i>LeUBI</i>         | Reference gene | CGTCGGGTTCTACGAGAAAG  | GTTCCGTGCTTTGTTTCCTTG     | 133         | 82                  |

Table S2. Information of Domains in HSPs.

| HSPs        | Domain number | Domain name       | Location |     |
|-------------|---------------|-------------------|----------|-----|
| LeSHSP. 1   | 1             | ACD_sHsps-like    | 71       | 175 |
| LeSHSP. 2   | 1             | IbpA              | 50       | 154 |
| LeSHSP. 3   | 1             | ACD_sHsps-like    | 50       | 185 |
| LeSHSP. 4   | 1             | IbpA              | 53       | 155 |
| LeSHSP. 5   | 1             | IbpA              | 52       | 155 |
| LeSHSP. 6   | 1             | IbpA              | 50       | 153 |
| LeSHSP. 7   | 1             | IbpA              | 43       | 146 |
| LeSHSP. 8   | 1             | ACD_sHsps-like    | 151      | 229 |
| LeHSP40. 1  | 2             | DnaJ_C            | 202      | 333 |
|             |               | DnaJ              | 7        | 64  |
| LeHSP40. 2  | 2             | DnaJ_C            | 292      | 423 |
|             |               | DnaJ              | 74       | 135 |
| LeHSP40. 3  | 2             | DnaJ_C            | 209      | 343 |
|             |               | DnaJ              | 6        | 68  |
| LeHSP40. 4  | 2             | DnaJ_C            | 198      | 344 |
|             |               | DnaJ              | 20       | 81  |
| LeHSP40. 5  | 2             | DnaJ_C            | 225      | 356 |
|             |               | DnaJ              | 4        | 66  |
| LeHSP40. 6  | 2             | DnaJ_C            | 276      | 412 |
|             |               | DnaJ              | 12       | 63  |
| LeHSP60. 1  | 1             | Cpn60_TCP1        | 44       | 534 |
| LeHSP60. 2  | 1             | Cpn60_TCP1        | 33       | 539 |
| LeHSP60. 3  | 1             | Cpn60_TCP1        | 37       | 528 |
| LeHSP60. 4  | 1             | Cpn60_TCP1        | 30       | 541 |
| LeHSP60. 5  | 1             | Cpn60_TCP1        | 49       | 573 |
| LeHSP60. 6  | 1             | Cpn60_TCP1        | 32       | 555 |
| LeHSP60. 7  | 1             | Cpn60_TCP1        | 45       | 538 |
| LeHSP60. 8  | 1             | Cpn60_TCP1        | 38       | 543 |
| LeHSP60. 9  | 1             | Cpn60_TCP1        | 29       | 516 |
| LeHSP70. 1  | 1             | HSP70             | 6        | 611 |
| LeHSP70. 2  | 1             | HSP70             | 9        | 607 |
| LeHSP70. 3  | 1             | HSP70             | 39       | 604 |
| LeHSP70. 4  | 1             | HSP70 superfamily | 25       | 724 |
| LeHSP70. 5  | 1             | HSP70             | 50       | 654 |
| LeHSP70. 6  | 1             | HSP70 superfamily | 22       | 512 |
| LeHSP90. 1  | 2             | HSP90             | 183      | 673 |
| LeHSP90. 1  |               | ATPase_c          | 26       | 181 |
| LeHSP90. 2  | 2             | HSP90             | 223      | 768 |
| LeHSP90. 2  |               | ATPase_c          | 54       | 163 |
| LeHSP100. 1 | 5             | AAA_2             | 603      | 767 |
|             |               | AAA_lid_9         | 346      | 446 |

|             |   |               |     |     |
|-------------|---|---------------|-----|-----|
|             |   | ClpB_D2-small | 773 | 852 |
|             |   | AAA           | 204 | 341 |
|             |   | Clp_N         | 95  | 145 |
|             |   |               | 22  | 67  |
| LeHSP100. 2 | 4 | AAA_2         | 478 | 645 |
|             |   | AAA_lid_9     | 219 | 322 |
|             |   | ClpB_D2-small | 653 | 731 |
|             |   | AAA           | 82  | 211 |
| LeHSP100. 3 | 4 | AAA_2         | 464 | 631 |
|             |   | AAA_lid_9     | 205 | 308 |
|             |   | ClpB_D2-small | 639 | 717 |
|             |   | AAA           | 68  | 197 |

Table S3. Amino sequence of motifs in HSPs

| Motifs   | Amino acid sequence                                |
|----------|----------------------------------------------------|
| Motif 1  | MSLYFYEPSYQWDRFFDRAFGSAASRGGZ                      |
| Motif 2  | GQSQUALTERSD                                       |
| Motif 3  | FIRPKMDLHEDKEKNLVTATFELPGVKKEDIQLDVHBGRLT          |
| Motif 4  | KVSEEHEZDGYAVRERSYGKFSRTLQLPRGVKEE                 |
| Motif 5  | EIKASMEBGVLTVTFPKATPEEKPKKITI                      |
| Motif 6  | TDYYELLGVSPDASEDDIKKAYKKLALKYHPDKNAD               |
| Motif 7  | FKEIAEAYEILSDEEKRAVYD                              |
| Motif 8  | VTLEDLYKGKTVKLKITRRVLCGSCCKGSG                     |
| Motif 9  | AGDVVFVVEEAPHDRFKRQGNDDLVDVKIPLLEAL                |
| Motif 10 | GDLFVKFNVLVLP                                      |
| Motif 11 | SNIVAALALABVVRTSLGPRGMDKMJVDAKGE                   |
| Motif 12 | TNDGATILKEIZVEHPAAKLLVDJSQAQDDEVGDGTTSVVVLAGELL    |
| Motif 13 | TILLRGSNEQIVDEVERALHDALSVVKNLVKDGRLVPGGGA          |
| Motif 14 | KGKEQYAVQAFASALEVIPRTLAENAGLDSID                   |
| Motif 15 | GGIVDMTEAGVWEPLLVKRQAJKSATEAAVLLLRVDDIVQA          |
| Motif 16 | INSFYSNKEIFLRELISNANDA                             |
| Motif 17 | IRDTGIGMGKEELVNNLGTJAKSGTKGFL                      |
| Motif 18 | LIGQFGLGFYSAFLVAEKVQVISKPNDDKYPW                   |
| Motif 19 | WEELNGQKPIWTRDPKEITDEEYSAFYKAFFKDWDPLSWKHFS        |
| Motif 20 | VVISNRJVDSPCVJVAGQFGWSANMZRM                       |
| Motif 21 | EEIRRTIQILSRRTKSNPVLIGPPGVGKTAILEGLASRIVAKEVPESLQN |
| Motif 22 | TTPDEYRKTIGKDAALERRFQPVSIDEPTVESTISILRGLKPRYEVHHGV |
| Motif 23 | VVGQDHVVTAISDAVRMSRAGLQAPNRPVASFLFLGPTGVGKTELCKALA |
| Motif 24 | FNDEQRGLININMSEYHDRHTISRLGAAPGYVGFEEGGQLTEAVRRKPY  |
| Motif 25 | HKDVAMILLQILDEGSVTDSQGRKVDKNTIICLTSLGSDILAHKSDCN   |
| Motif 26 | IGIDLGTTYSCVGVWQGDRVEIANDQGNRTTPSYVAF              |
| Motif 27 | ERLIGDPAKNQAAMNPKNVTFDAKRLIGRKFDQEVQKDMKHWPFEVVEK  |
| Motif 28 | FLGKKVTHAVITVPAYFNDAQRQATKDAGTIAGLDVLRINEPTAAAIAY  |
| Motif 29 | TRARFEELVEDLFKSTLDPVEKVLKDAKVKKDKIDEIVLVGGSTRIPKIQ |
| Motif 30 | YEGERTQTKDNNLLGKFELSGIPPAPRGVPQIEVTFDIDANGILKVSAD  |
